# Supplementary material for: A dual-function chromogenic and fluorogenic benzofurazan probe for plazomicin and its innovative utility for development of two microwell assays with high throughput for analysis of drug substance and pharmaceutical formulations
Source: Royal Society of Chemistry journal article supplement (doi:10.1039/d4ra04882b), 2024-01-01
Supplement: d4ra04882b1.pdf [file d4ra04882b1.pdf]

## ***Supplementary Information***

**A dual-function chromogenic and fluorogenic benzofurazan probe for plazomicin and its innovative utility for development of two microwell assays with high through for analysis of drug substance and pharmaceutical formulations**

**Fai A. Alkathiri<sup>1\*</sup>, Majed Al-Outaibi<sup>2</sup>, Ibrahim A. Darwish<sup>2</sup>**

<sup>1</sup> Department of Pharmaceutics, College of Pharmacy, King Saud University, Riyadh 11451, Saudi Arabia.

<sup>2</sup> Department of Pharmaceutical Chemistry, College of Pharmacy, King Saud University, P.O. Box 2457, Riyadh 11451, Saudi Arabia.

\* Correspondence author at: Department of Pharmaceutics, College of Pharmacy, King Saud University, P.O. Box 2457, Riyadh 11451, Saudi Arabia. E-mail address: falkathire@@ksu.edu.sa; Tel: +966-118052392; Fax: +966-114677200.

Table 1S. The improvement of the proposed assay over the reported methodologies for PLZ.

| Parameter              | Proposed assays                    | Reported methodologies                        |
|------------------------|------------------------------------|-----------------------------------------------|
| Sample                 | Drug substance                     | Drug substance and pharmaceutical formulation |
| Instrument             | HPLC                               | A multi-mode microplate reader                |
| Detection mode         | On-line mass detector              | Visible light absorbance and fluorescence     |
| Instrument cost        | High                               | Low                                           |
| Analysis type          | Sequential                         | Batch                                         |
| Analysis convenience   | Complex and instrumental intensive | Very convenient                               |
| Analysis throughput    | Low (3 samples/hour)               | High (1152 samples/hour)                      |
| Eco-friendly/Greenness | Not eco-friendly/not green         | Eco-friendly/green                            |
